# Supplementary material
Source: PubMed Central journal article supplement (PMC5624332)
Supplement: NIHMS907329-supplement-supplement_1.pdf [file NIHMS907329-supplement-supplement_1.pdf]

## Supplementary Information

**Supplementary Table 1. Serum fatty acid profiles of F1 generation animals on the HCO, SOY and DHA diets**

| Fatty acid                                           | HCO<br>(N=4) | SOY<br>(N=5) | DHA<br>(N=5) | P     |
|------------------------------------------------------|--------------|--------------|--------------|-------|
| <b>Saturated Fats</b>                                |              |              |              |       |
| Tetradecanoic (myristic) acid, 14:0                  | 1.346±0.142  | 0.688±0.492  | 1.177±0.675  | 0.359 |
| Hexadecanoic (palmitic) acid, 16:0                   | 20.269±1.370 | 20.765±2.361 | 24.036±1.029 | 0.016 |
| Octadecanoic (stearic) acid, 18:0                    | 7.381±0.370  | 9.863±0.969  | 7.049±0.596  | 0.013 |
| <b>Monounsaturated Fats</b>                          |              |              |              |       |
| Hexadecenoic (palmitoleic) acid, 16:1ω7              | 8.308±0.782  | 2.936±1.383  | 6.412±1.023  | 0.005 |
| Octadecenoic (vaccenic) acid, 18:1ω7                 | 4.900±0.470  | 1.827±0.496  | 0.998±0.149  | 0.003 |
| Octadecenoic (oleic) acid, 18:1ω9                    | 22.766±1.252 | 14.935±3.228 | 15.493±1.067 | 0.009 |
| <b>Polyunsaturated Fats</b>                          |              |              |              |       |
| Octadecatrienoic (alpha-linolenic) acid, 18:3ω3      | 0.004±0.010  | 0.159±0.050  | 0            | 0.004 |
| Eicosapentaenoic (trimnodonic) acid, 20:5ω3          | 0.078±0.012  | 0.229±0.057  | 5.558±0.638  | 0.003 |
| Docosapentaenoic (clupanodonic) acid, 22:5ω3         | 0.089±0.022  | 0.226±0.162  | 0.538±0.061  | 0.008 |
| Docosahexaenoic acid, 22:6ω3                         | 2.865±0.301  | 9.215±2.264  | 24.949±2.791 | 0.003 |
| Octadecadienoic (linoleic) acid, 18:2ω6              | 8.380±0.451  | 17.464±0.968 | 5.950±0.346  | 0.003 |
| Octadecatrienoic (gamma-linolenic) acid, 18:3ω6      | 0.221±0.140  | 0.199±0.167  | 0            | 0.009 |
| Eicosatrienoic (dihomo-gamma-linolenic) acid, 20:3ω6 | 1.611±0.094  | 0.899±0.353  | 0.132±0.081  | 0.003 |
| Eicosatetraenoic (arachidonic) acid, 20:4ω6          | 8.795±0.586  | 19.502±5.444 | 6.409±0.317  | 0.003 |
| Eicosatrienoic (mead) acid, 20:3ω9                   | 9.370±1.002  | 0.123±0.044  | 0.018±0.039  | 0.004 |
| <b>Totals</b>                                        |              |              |              |       |
| Total ω3                                             | 3.036±0.287  | 9.829±2.357  | 31.045±2.338 | 0.003 |
| Total ω6                                             | 19.048±0.859 | 38.276±5.402 | 12.491±0.315 | 0.003 |
| Total ω9                                             | 32.545±1.451 | 15.131±3.183 | 15.688±1.067 | 0.010 |
| Total ω-7                                            | 5.134±0.533  | 1.827±0.496  | 1.032±0.192  | 0.003 |
| Total saturated FA                                   | 30.856±1.004 | 31.849±2.921 | 33.333±1.452 | 0.113 |
| Total monounsaturated FA                             | 36.617±1.436 | 19.772±5.039 | 23.114±1.119 | 0.008 |
| Total polyunsaturated FA                             | 32.527±0.902 | 48.380±7.698 | 43.553±2.336 | 0.008 |
| <b>Ratios</b>                                        |              |              |              |       |
| Triene:Tetraene ratio                                | 1.072±0.170  | 0.006±0.002  | 0.003±0.006  | 0.006 |
| ω6/ω3 ratio                                          | 6.305±0.440  | 3.981±0.484  | 0.404±0.033  | 0.003 |

All values represent percent ± SD.

**Supplementary Table 2. Serum fatty acid profiles of aged animals following acute dietary treatment with the CHOW, SOY or DHA diet**

| <b>Fatty acid</b>                                    | <b>CHOW<br/>(N=5)</b> | <b>SOY<br/>(N=5)</b> | <b>DHA<br/>(N=5)</b> | <b>P</b> |
|------------------------------------------------------|-----------------------|----------------------|----------------------|----------|
| <b>Saturated Fats</b>                                |                       |                      |                      |          |
| Tetradecanoic (myristic) acid, 14:0                  | 0.568±0.084           | 0.510±0.057          | 1.162±0.396          | 0.007    |
| Hexadecanoic (palmitic) acid, 16:0                   | 34.939±0.496          | 34.105±3.256         | 33.488±9.150         | 0.357    |
| Octadecanoic (stearic) acid, 18:0                    | 17.912±1.544          | 19.879±1.331         | 22.826±4.556         | 0.054    |
| <b>Monounsaturated Fats</b>                          |                       |                      |                      |          |
| Hexadecenoic (palmitoleic) acid, 16:1ω7              | 2.091±0.356           | 2.342±0.256          | 3.247±0.863          | 0.090    |
| Octadecenoic (vaccenic) acid, 18:1ω7                 | 1.218±0.105           | 1.558±0.482          | 1.311±0.240          | 0.326    |
| Octadecenoic (oleic) acid, 18:1ω9                    | 9.976±1.422           | 11.301±1.436         | 11.617±2.483         | 0.275    |
| <b>Polyunsaturated Fats</b>                          |                       |                      |                      |          |
| Octadecatrienoic (alpha-linolenic) acid, 18:3ω3      | 0.552±0.181           | 0.217±0.032          | 0.030±0.006          | 0.002    |
| Eicosapentaenoic (trimnodonic) acid, 20:5ω3          | 1.112±0.125           | 0.363±0.069          | 4.865±0.792          | 0.002    |
| Docosapentaenoic (clupanodonic) acid, 22:5ω3         | 0.147±0.018           | 0.060±0.017          | 0.159±0.036          | 0.008    |
| Docosahexaenoic acid, 22:6ω3                         | 2.253±0.261           | 2.759±0.556          | 7.282±1.245          | 0.005    |
| Octadecadienoic (linoleic) acid, 18:2ω6              | 22.114±1.098          | 13.774±1.334         | 7.778±1.289          | 0.002    |
| Octadecatrienoic (gamma-linolenic) acid, 18:3ω6      | 0.107±0.020           | 0.160±0.094          | 0.006±0.014          | 0.016    |
| Eicosatrienoic (dihomo-gamma-linolenic) acid, 20:3ω6 | 0.572±0.032           | 0.813±0.171          | 0.299±0.055          | 0.002    |
| Eicosatetraenoic (arachidonic) acid, 20:4ω6          | 5.693±0.773           | 10.998±1.547         | 4.793±0.315          | 0.003    |
| Eicosatrienoic (mead) acid, 20:3ω9                   | 0.047±0.012           | 0.217±0.051          | 0.130±0.037          | 0.003    |
| <b>Totals</b>                                        |                       |                      |                      |          |
| Total omega-3 (ω-3)                                  | 3.952±0.472           | 3.399±0.635          | 12.335±1.594         | 0.005    |
| Total omega-6 (ω-6)                                  | 28.626±1.043          | 25.868±2.801         | 12.914±1.408         | 0.005    |
| Total omega-9 (ω-9)                                  | 10.302±1.375          | 11.919±1.673         | 12.228±2.824         | 0.228    |
| Total omega-7 (ω-7)                                  | 1.259±0.097           | 1.617±0.470          | 1.392±0.309          | 0.230    |
| Total saturated fatty acids                          | 53.742±1.828          | 52.767±4.370         | 57.871±4.702         | 0.395    |
| Total monounsaturated fatty acids                    | 13.605±1.739          | 15.661±2.187         | 16.750±3.823         | 0.395    |
| Total polyunsaturated fatty acids                    | 32.653±1.297          | 29.572±3.344         | 25.378±2.413         | 0.016    |
| <b>Ratios</b>                                        |                       |                      |                      |          |
| Triene:Tetraene ratio                                | 0.009±0.003           | 0.020±0.002          | 0.027±0.007          | 0.005    |
| Omega-6 (ω-6)/omega-3 (ω-3) ratio                    | 7.318±0.830           | 7.749±1.149          | 1.057±0.144          | 0.009    |

All values represent percent ± SD.

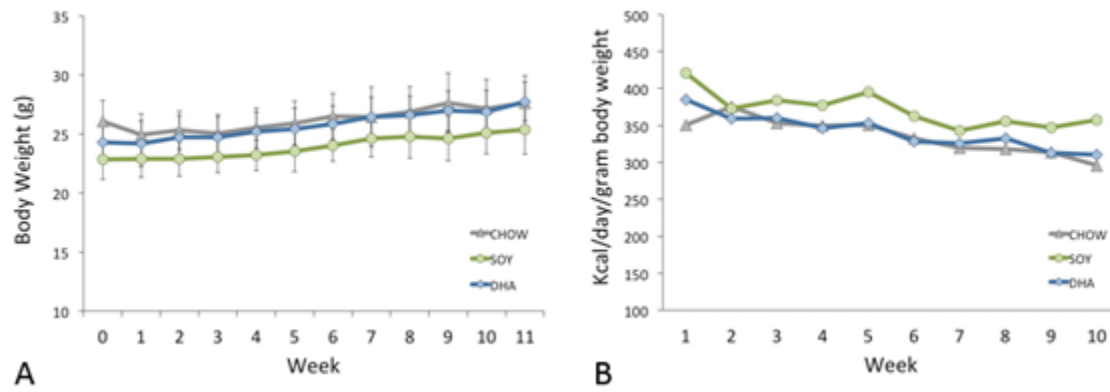

**Supplementary Figure 1. Animal growth and diet consumption in acute dietary treatment.** There was no difference in (A) body weights or (B) kcal consumed at any time point spanning the 11week study. All data represented as mean  $\pm$  SD.
